# Supplementary material for: Nutrition-Related Knowledge, Attitudes, Practices, and Anemia Status of Lactating Mothers in Bukavu, Democratic Republic of the Congo—A Cross-Sectional Analysis
Source: MDPI journal article supplement (doi:10.3390/nu16060870), 2024-03-17
Supplement: s1 [file s1]

**Table S1:** Knowledge of lactating mothers about the three food group model and malnutrition

| <b>Variables <sup>a</sup></b>                      | <b>Total <sup>b</sup></b><br><b>N=444</b> |
|----------------------------------------------------|-------------------------------------------|
| <i>Knowledge about three food group model</i>      |                                           |
| Good Food <sup>c</sup>                             | n=434                                     |
| Three food group model                             | 30.6 (133)                                |
| Other                                              | 40.3 (175)                                |
| Do not know                                        | 29.3 (127)                                |
| Three food group model <sup>c</sup>                | n=435                                     |
| Energy-giving                                      | 31.5 (137)                                |
| Construction                                       | 27.1 (118)                                |
| Protection                                         | 25.3 (110)                                |
| Wrong answer                                       | 9.4 (41)                                  |
| Do not know                                        | 50.1 (218)                                |
| Three food group model – Number of correct answers | n=435                                     |
| 0                                                  | 58.9 (256)                                |
| 1                                                  | 12.9 (56)                                 |
| 2                                                  | 13.8 (60)                                 |
| 3                                                  | 14.5 (63)                                 |
| Energy-giving foods <sup>c</sup>                   | n=437                                     |
| Staples                                            | 15.8 (69)                                 |
| Oil                                                | 7.1 (31)                                  |
| Sugar / sugared foods/drinks                       | 24.3 (106)                                |
| Other correct answer                               | 1.6 (7)                                   |
| Wrong answer                                       | 19.9 (87)                                 |
| Do not know                                        | 49.0 (214)                                |
| Constructive foods <sup>c</sup>                    | n=439                                     |
| Animal foods                                       | 17.1 (75)                                 |
| Legumes                                            | 23.7 (104)                                |
| Wrong answer                                       | 15.3 (67)                                 |
| Do not know                                        | 56.9 (250)                                |
| Protective foods <sup>c</sup>                      | n=436                                     |
| Vegetables                                         | 22.0 (96)                                 |
| Fruits                                             | 15.4 (67)                                 |
| Wrong answer                                       | 10.8 (47)                                 |
| Do not know                                        | 63.8 (278)                                |
| <i>Knowledge about malnutrition</i>                |                                           |
| Malnutrition <sup>c</sup>                          | n=436                                     |
| Deficiency of nutrients                            | 44.3 (193)                                |
| Bad life                                           | 0.7 (3)                                   |
| Change of the body                                 | 1.1 (5)                                   |
| Poor diet, lack of food/nutrients                  | 4.1 (18)                                  |
| Disease                                            | 19.3 (84)                                 |
| Disease due to poor diet                           | 0.2 (1)                                   |
| Disease due to short birth space                   | 0.2 (1)                                   |
| Edema, swelling of cheeks and feet                 | 0.5 (2)                                   |
| Impaired health, decrease of vitamins              | 0.2 (1)                                   |
| Intestinal worms                                   | 0.9 (4)                                   |
| Lack of means                                      | 0.2 (1)                                   |
| Weakness                                           | 0.5 (2)                                   |
| Other, not precised                                | 0.7 (3)                                   |
| Do not know                                        | 28.7 (125)                                |

|                                                            |               |
|------------------------------------------------------------|---------------|
| Consequences and symptoms of malnutrition <sup>c</sup>     | <i>n</i> =441 |
| Weakness, lack of energy to work                           | 13.4 (59)     |
| Get infectious diseases (more easily)                      | 1.8 (8)       |
| Loss of weight, face of an old person                      | 10.2 (45)     |
| Impaired mental and physical development                   | 4.3 (19)      |
| Edema                                                      | 50.8 (224)    |
| Change of the skin                                         | 65.5 (289)    |
| Change of hair                                             | 70.3 (310)    |
| Change of the body                                         | 1.8 (8)       |
| Death                                                      | 0.2 (1)       |
| Consequences of iron deficiency                            | 0.1 (1)       |
| Intestinal worms                                           | 0.9 (4)       |
| Lack of appetite                                           | 0.2 (1)       |
| Do not know                                                | 14.1 (62)     |
| Causes of malnutrition <sup>c</sup>                        | <i>n</i> =441 |
| Eating too little                                          | 46.0 (203)    |
| Eating too watery meals (poor in nutrients)                | 16.3 (72)     |
| Eating non-divers meals (monotony)                         | 14.3 (63)     |
| Not eating during illness                                  | 10.2 (45)     |
| Parasitic infections                                       | 1.4 (6)       |
| Poor breastfeeding practices                               | 0.2 (1)       |
| Disease                                                    | 1.4 (6)       |
| Poor diet                                                  | 11.6 (51)     |
| Bad life                                                   | 0.7 (3)       |
| Pregnancy while small infant/breastfed infant              | 0.5 (2)       |
| Heredity                                                   | 0.2 (1)       |
| Lack of consideration in the family                        | 0.2 (1)       |
| Lack of financial means, poverty                           | 1.1 (5)       |
| Lack of peace                                              | 0.5 (2)       |
| Weaning                                                    | 0.2 (1)       |
| Wrong answer                                               | 0.2 (1)       |
| Do not know                                                | 20.9 (92)     |
| Prevention of malnutrition <sup>c</sup>                    | <i>n</i> =439 |
| Eating diversified food                                    | 28.0 (123)    |
| Eating nutrient-rich food                                  | 34.2 (150)    |
| Avoiding short birth space                                 | 0.2 (1)       |
| Child care                                                 | 0.2 (1)       |
| Consulting medical staff, going for treatment              | 2.7 (12)      |
| Eating enough / a lot                                      | 4.6 (20)      |
| Deworming                                                  | 0.2 (1)       |
| Good food, eating, eating well / regularly, preparing well | 12.5 (55)     |
| Hygiene (food, body) / cleanliness                         | 0.9 (4)       |
| Knowledge                                                  | 0.5 (2)       |
| Living well                                                | 0.2 (1)       |
| Financial means, work                                      | 1.8 (8)       |
| Wrong answer                                               | 0.2 (1)       |
| Do not know                                                | 29.2 (128)    |

<sup>a</sup> Categorical variables are expressed as % (n).

<sup>b</sup> Lack of corresponding sum of frequencies with total sample size is due to missing data; total frequencies per variable are given.

<sup>c</sup> Multiple response question.

**Table S2:** Knowledge of lactating mothers about iron and anemia

| <b>Variables <sup>a</sup></b>                                     | <b>Total <sup>b</sup><br/>N=444</b> |
|-------------------------------------------------------------------|-------------------------------------|
| <i>Iron, iron deficiency, anemia</i>                              |                                     |
| Knowing iron                                                      | <i>n</i> =434                       |
| Yes                                                               | 4.8 (21)                            |
| No                                                                | 86.4 (375)                          |
| Do not know                                                       | 38 (8.8)                            |
| Knowing anemia                                                    | <i>n</i> =442                       |
| Yes                                                               | 29.6 (131)                          |
| No                                                                | 61.5 (272)                          |
| Do not know                                                       | 8.8 (39)                            |
| Signs/symptoms of anemia <sup>c</sup>                             | <i>n</i> =438                       |
| Fatigue, weakness, lack of energy                                 | 11.9 (52)                           |
| Pallor                                                            | 20.3 (89)                           |
| Spoon-shaped nails                                                | 2.3 (10)                            |
| Getting infectious diseases (more easily)                         | 2.5 (11)                            |
| Change of the skin                                                | 0.2 (1)                             |
| Vertigo                                                           | 1.6 (7)                             |
| Feeling cold                                                      | 0.2 (1)                             |
| Wrong answer                                                      | 0.2 (1)                             |
| Do not know                                                       | 1.8 (8)                             |
| Does not know anemia                                              | 71.0 (311)                          |
| Consequences of iron-deficient nutrition in children <sup>c</sup> | <i>n</i> =438                       |
| Impaired growth                                                   | 10.3 (45)                           |
| Impaired mental and physical development                          | 9.1 (40)                            |
| (Frequent) illness                                                | 2.1 (9)                             |
| Decrease of blood, anemia                                         | 0.7 (3)                             |
| Death                                                             | 3.2 (14)                            |
| Poor health                                                       | 0.2 (1)                             |
| Vertigo                                                           | 0.2 (1)                             |
| Weakness                                                          | 1.1 (5)                             |
| Intestinal worms                                                  | 0.2 (1)                             |
| Lack of appetite                                                  | 0.2 (1)                             |
| Wrong answer                                                      | 1.6 (7)                             |
| Do not know                                                       | 75.1 (329)                          |
| Causes of anemia <sup>c</sup>                                     | <i>n</i> =440                       |
| Food with low iron content                                        | 6.4 (28)                            |
| Eating too little                                                 | 12.5 (55)                           |
| Diseases, infections                                              | 17.3 (76)                           |
| Poor diet (quantity/quality, not precised)                        | 3.6 (16)                            |
| Blood loss                                                        | 0.2 (1)                             |
| Do not know                                                       | 67.0 (295)                          |
| Prevention of anemia <sup>c</sup>                                 | <i>n</i> =440                       |
| Eating iron-rich foods                                            | 14.5 (64)                           |
| Eating vitamin C-rich foods with/after meals                      | 5.7 (25)                            |
| Ferment, roast, grind, soak to germinate                          | 1.4 (6)                             |
| Prevent/treat diseases/infections – visit hospital/health center  | 16.6 (73)                           |
| Eating blood-building foods                                       | 0.2 (1)                             |
| Eating enough/well                                                | 0.9 (4)                             |
| Eating foods enhancing iron bioavailability, nutrient-rich        | 0.5 (2)                             |
| Hygiene                                                           | 0.2 (1)                             |
| Testing                                                           | 0.2 (1)                             |
| Wrong answer                                                      | 0.9 (4)                             |
| Do not know                                                       | 67.5 (297)                          |

|                                                                |               |
|----------------------------------------------------------------|---------------|
| Iron-rich foods <sup>c</sup>                                   | <i>n</i> =439 |
| Organs                                                         | 3.9 (17)      |
| Meat, poultry                                                  | 1.6 (7)       |
| Fish                                                           | 1.8 (8)       |
| Insects                                                        | 0.9 (4)       |
| Green leaves                                                   | 28.7 (126)    |
| Legumes                                                        | 3.2 (14)      |
| Seeds, nuts                                                    | 0.7 (3)       |
| Other correct foods                                            | 0.7 (3)       |
| Wrong answer                                                   | 2.3 (10)      |
| Do not know                                                    | 67.4 (296)    |
| Foods and methods increasing iron bioavailability <sup>c</sup> | <i>n</i> =438 |
| Vitamin C-rich foods, especially fruits                        | 4.6 (20)      |
| Potatoes, tomatoes, cabbage                                    | 1.1 (5)       |
| Small quantity of meat/fish                                    | 2.7 (12)      |
| Fermentation                                                   | 0.5 (2)       |
| Roasting                                                       | 1.1 (5)       |
| Grinding                                                       | 0.5 (2)       |
| Soaking to germinate                                           | 0.2 (1)       |
| Other correct food/method                                      | 0.5 (2)       |
| Wrong answer                                                   | 0.7 (3)       |
| Do not know                                                    | 91.8 (402)    |
| Drinks decreasing iron bioavailability <sup>c</sup>            | <i>n</i> =434 |
| Coffee                                                         | 3.5 (15)      |
| Tea                                                            | 0.2 (1)       |
| Milk                                                           | 0.9 (4)       |
| Wrong answer                                                   | 8.1 (35)      |
| Do not know                                                    | 88.7 (385)    |
| Knowing fermentation                                           | <i>n</i> =435 |
| Yes                                                            | 36.6 (159)    |
| No                                                             | 60.9 (265)    |
| Do not know                                                    | 2.5 (11)      |

<sup>a</sup> Categorical variables are expressed as % (n).

<sup>b</sup> Lack of corresponding sum of frequencies with total sample size is due to missing data; total frequencies per variable are given.

<sup>c</sup> Multiple response question.

**Table S3:** Knowledge of lactating mothers about vitamin A and vitamin A deficiency

| <b>Variables <sup>a</sup></b>                                                 | <b>Total <sup>b</sup><br/>N=444</b> |
|-------------------------------------------------------------------------------|-------------------------------------|
| <i>Vitamin A, vitamin A deficiency (VAD)</i>                                  |                                     |
| Knowing vitamin A deficiency (VAD)                                            | <i>n</i> =440                       |
| Yes                                                                           | 34.8 (153)                          |
| No                                                                            | 58.9 (259)                          |
| Do not know                                                                   | 6.4 (28)                            |
| Signs/symptoms of VAD <sup>c</sup>                                            | <i>n</i> =438                       |
| Weakness, feeling less energetic                                              | 12.8 (56)                           |
| Getting infectious diseases (more easily)                                     | 4.1 (18)                            |
| Problems of vision: nightblindness, dry eyes, damage of the cornea, blindness | 9.8 (43)                            |
| Wrong answer                                                                  | 1.4 (6)                             |
| Do not know                                                                   | 10.7 (47)                           |
| Does not know VAD                                                             | 65.5 (287)                          |
| Causes of VAD <sup>c</sup>                                                    | <i>n</i> =439                       |
| Food with low vitamin A content                                               | 14.4 (63)                           |
| Eating without diversity of meals                                             | 8.0 (35)                            |
| Eating too little                                                             | 10.0 (44)                           |
| Poor diet                                                                     | 3.4 (15)                            |
| Disease                                                                       | 2.5 (11)                            |
| Lack of vitamin A                                                             | 0.2 (1)                             |
| Lack of means                                                                 | 0.2 (1)                             |
| Not going for treatment                                                       | 0.2 (1)                             |
| Wrong answer                                                                  | 0.7 (3)                             |
| Do not know                                                                   | 63.6 (279)                          |
| Prevention of VAD <sup>c</sup>                                                | <i>n</i> =439                       |
| Eating vitamin A-rich foods                                                   | 21.6 (95)                           |
| Good diet (eating, eating enough/a lot/normally/regularly/well/everything)    | 6.6 (29)                            |
| Consulting medical staff with problem, treat diseases                         | 0.9 (4)                             |
| Enough financial means                                                        | 0.5 (2)                             |
| Eating diversified food                                                       | 0.5 (2)                             |
| Eating recommended food / vitamin A-rich food if known                        | 0.5 (2)                             |
| Food hygiene                                                                  | 0.5 (2)                             |
| Eating blood-building food                                                    | 0.2 (1)                             |
| Fruits                                                                        | 0.2 (1)                             |
| Vitamin A supplementation                                                     | 0.2 (1)                             |
| Increase vitamin A                                                            | 0.2 (1)                             |
| Wrong answer                                                                  | 0.5 (2)                             |
| Do not know                                                                   | 69.7 (306)                          |
| Vitamin A-rich foods <sup>c</sup>                                             | <i>n</i> =437                       |
| Organs                                                                        | 3.9 (17)                            |
| Egg/egg yolk                                                                  | 2.7 (12)                            |
| Fish                                                                          | 3.2 (14)                            |
| Milk, yogurt, cheese                                                          | 4.1 (18)                            |
| Green leaves                                                                  | 14.6 (64)                           |
| Orange-fleshed vegetables                                                     | 17.8 (78)                           |
| Orange-fleshed fruits                                                         | 6.2 (27)                            |
| Palm oil                                                                      | 2.5 (11)                            |
| Wrong answer                                                                  | 1.6 (7)                             |
| Do not know                                                                   | 64.8 (283)                          |

<sup>a</sup> Categorical variables are expressed as % (n).

<sup>b</sup> Lack of corresponding sum of frequencies with total sample size is due to missing data; total frequencies per variable are given.

<sup>c</sup> Multiple response question.

VAD: vitamin A deficiency.

**Table S4:** Practices of lactating mothers regarding iron

| Variables <sup>a</sup>                                        | Total <sup>b</sup><br>N=444 |
|---------------------------------------------------------------|-----------------------------|
| <i>Iron-rich foods, bioavailability</i>                       |                             |
| Time point of eating fruits <sup>c</sup>                      | n=441                       |
| Directly before the meal                                      | 11.8 (52)                   |
| With the meal                                                 | 10.7 (47)                   |
| Directly after the meal                                       | 66.6 (293)                  |
| Between the meals                                             | 9.3 (41)                    |
| No specific time given                                        | 12.7 (56)                   |
| Do not know                                                   | 2.5 (11)                    |
| Drinking coffee or tea                                        | n=441                       |
| Yes                                                           | 75.7 (334)                  |
| No                                                            | 24.0 (106)                  |
| Do not know                                                   | 0.2 (1)                     |
| Time point of drinking coffee/tea, if drinking <sup>c</sup>   | n=333                       |
| Directly before the meal                                      | 18.6 (62)                   |
| With the meal                                                 | 14.4 (48)                   |
| Directly after the meal                                       | 74.5 (248)                  |
| Between the meals                                             | 9.3 (31)                    |
| No specific time given                                        | 4.5 (15)                    |
| Practicing fermentation                                       | n=423                       |
| Yes                                                           | 14.7 (62)                   |
| No                                                            | 82.0 (347)                  |
| Do not know                                                   | 3.3 (14)                    |
| Fermented foods, if practicing fermentation <sup>d</sup>      | n=62                        |
| Manioc                                                        | 77.4 (48)                   |
| Avocado                                                       | 11.3 (7)                    |
| Banana                                                        | 6.5 (4)                     |
| Manioc for <i>Cikwange</i> (local food with fermented manioc) | 6.5 (4)                     |
| Wheat                                                         | 4.8 (3)                     |
| Maize                                                         | 1.6 (1)                     |
| All                                                           | 1.6 (1)                     |
| Fruits                                                        | 1.6 (1)                     |
| Vegetables                                                    | 1.6 (1)                     |
| Mandale                                                       | 3.2 (2)                     |
| Practicing roasting of flour                                  | n=441                       |
| Yes                                                           | 2.9 (13)                    |
| No                                                            | 95.5 (421)                  |
| Do not know                                                   | 1.6 (7)                     |
| Consumption frequency of animal foods                         | n=425                       |
| Several times per day                                         | 0.2 (1)                     |
| Once per day                                                  | 2.8 (12)                    |
| 5-6x per week                                                 | 5.2 (22)                    |
| 3-4x per week                                                 | 16.5 (70)                   |
| 2x per week                                                   | 30.6 (130)                  |
| Once per week                                                 | 21.4 (91)                   |
| Once per 2 weeks / 2x per month                               | 8.0 (34)                    |
| Once per month                                                | 5.4 (23)                    |
| Rarely                                                        | 0.9 (4)                     |
| Never                                                         | 5.2 (22)                    |
| According to financial availability                           | 2.1 (9)                     |
| At any time                                                   | 0.2 (1)                     |
| Do not eat meat and milk                                      | 0.2 (1)                     |
| Do not know                                                   | 1.2 (5)                     |

|                                                 |               |
|-------------------------------------------------|---------------|
| Consumption frequency of green leafy vegetables | <i>n</i> =442 |
| Several times per day                           | 10.9 (48)     |
| Once per day                                    | 24.2 (107)    |
| 5-6x per week                                   | 18.1 (80)     |
| 3-4x per week                                   | 20.1 (89)     |
| 2x per week                                     | 19.5 (86)     |
| Once per week                                   | 3.8 (17)      |
| Once per 2 weeks / 2x per month                 | 1.6 (7)       |
| Once per month                                  | 0.7 (3)       |
| Eating by lack of means                         | 0.2 (1)       |
| According to availability                       | 0.2 (1)       |
| Causing amoeba                                  | 0.2 (1)       |
| Satisfaction                                    | 0.2 (1)       |
| Do not know                                     | 0.2 (1)       |

<sup>a</sup> Categorical variables are expressed as % (n).

<sup>b</sup> Lack of corresponding sum of frequencies with total sample size is due to missing data; total frequencies per variable are given.

<sup>c</sup> Multiple response question.

**Table S5:** Nutrition-related attitudes of lactating mothers

| <b>Variables <sup>a</sup></b>                                         | <b>Total <sup>b</sup><br/>N=444</b> |
|-----------------------------------------------------------------------|-------------------------------------|
| <i>Attitudes towards malnutrition</i>                                 |                                     |
| Perceived susceptibility: Possibility of being malnourished           | <i>n</i> =424                       |
| Possible                                                              | 24.8 (105)                          |
| Not possible                                                          | 46.9 (199)                          |
| Do not know                                                           | 26.4 (112)                          |
| No answer                                                             | 1.9 (8)                             |
| Perceived severity: Evaluation of malnutrition                        | <i>n</i> =441                       |
| Problem                                                               | 85.5 (377)                          |
| No problem                                                            | 2.5 (11)                            |
| Do not know                                                           | 11.6 (51)                           |
| No answer                                                             | 0.5 (2)                             |
| <i>Attitudes towards anemia</i>                                       |                                     |
| Perceived susceptibility: Possibility of being anemic                 | <i>n</i> =420                       |
| Possible                                                              | 24.3 (102)                          |
| Not possible                                                          | 32.1 (135)                          |
| Do not know                                                           | 41.7 (175)                          |
| No answer                                                             | 1.9 (8)                             |
| Perceived severity: Evaluation of anemia                              | <i>n</i> =418                       |
| Problem                                                               | 77.0 (322)                          |
| No problem                                                            | 1.0 (4)                             |
| Do not know                                                           | 21.3 (89)                           |
| No answer                                                             | 0.7 (3)                             |
| <i>Attitudes towards iron-rich foods</i>                              |                                     |
| Perceived benefits: Evaluation of preparation of iron-rich foods      | <i>n</i> =443                       |
| Good                                                                  | 71.6 (317)                          |
| Bad                                                                   | 2.7 (12)                            |
| Do not know                                                           | 24.6 (109)                          |
| No answer                                                             | 1.1 (5)                             |
| Perceived barriers: Difficulty of preparing iron-rich foods           | <i>n</i> =425                       |
| Difficult                                                             | 14.6 (62)                           |
| Neither difficult nor easy                                            | 31.1 (132)                          |
| Easy                                                                  | 9.2 (39)                            |
| Do not know                                                           | 42.1 (179)                          |
| No answer                                                             | 3.1 (13)                            |
| Self-confidence: Confidence in preparing iron-rich foods              | <i>n</i> =439                       |
| Not confident                                                         | 16.9 (74)                           |
| Ok / so-so                                                            | 15.5 (68)                           |
| Confident                                                             | 19.4 (85)                           |
| Do not know                                                           | 40.5 (178)                          |
| No answer                                                             | 7.7 (34)                            |
| <i>Attitudes towards vitamin A deficiency</i>                         |                                     |
| Perceived susceptibility: Possibility of being vitamin A deficient    | <i>n</i> =435                       |
| Possible                                                              | 17.9 (78)                           |
| Not possible                                                          | 29.4 (128)                          |
| Do not know                                                           | 50.6 (220)                          |
| No answer                                                             | 2.1 (9)                             |
| Perceived severity: Evaluation of vitamin A deficiency                | <i>n</i> =438                       |
| Problem                                                               | 69.4 (304)                          |
| No problem                                                            | 2.5 (11)                            |
| Do not know                                                           | 26.9 (118)                          |
| No answer                                                             | 1.1 (5)                             |
| <i>Attitudes towards vitamin A-rich foods</i>                         |                                     |
| Perceived benefits: Evaluation of preparation of vitamin A-rich foods | <i>n</i> =442                       |
| Good                                                                  | 71.9 (318)                          |
| Bad                                                                   | 1.8 (8)                             |
| Do not know                                                           | 24.9 (110)                          |
| No answer                                                             | 1.4 (6)                             |



|                                                                  |               |
|------------------------------------------------------------------|---------------|
| Perceived barriers: Difficulty of preparing vitamin A-rich foods | <i>n</i> =441 |
| Difficult                                                        | 17.0 (75)     |
| Neither difficult nor easy                                       | 26.3 (116)    |
| Easy                                                             | 7.9 (35)      |
| Do not know                                                      | 44.0 (194)    |
| No answer                                                        | 4.8 (21)      |
| Self-confidence: Confidence in preparing vitamin A-rich foods    | <i>n</i> =442 |
| Not confident                                                    | 16.7 (74)     |
| Ok / so-so                                                       | 15.4 (68)     |
| Confident                                                        | 19.7 (87)     |
| Do not know                                                      | 42.3 (187)    |
| No answer                                                        | 5.9 (26)      |

<sup>a</sup> Categorical variables are expressed as % (n).

<sup>b</sup> Lack of corresponding sum of frequencies with total sample size is due to missing data; total frequencies per variable are given.

**Table S6:** Ability of justification for nutrition-related attitudes of lactating mothers

| Variables <sup>a</sup>                                                 | Not possible, no problem, bad, difficult, not confident | Neither-nor, ok / so-so | Possible, problem, good, easy, confident | Total <sup>b</sup><br>N=444 | P-value <sup>c</sup> | Effect size |
|------------------------------------------------------------------------|---------------------------------------------------------|-------------------------|------------------------------------------|-----------------------------|----------------------|-------------|
| <i>Attitudes towards malnutrition</i>                                  |                                                         |                         |                                          |                             |                      |             |
| Perceived susceptibility: Possibility of being malnourished            | n=195                                                   |                         | n=105                                    | n=300                       | <0.001†              | 0.280       |
| Can state a reason                                                     | 62.1 (121)                                              |                         | 86.7 (91)                                | 70.7 (212)                  |                      |             |
| Do not know                                                            | 37.4 (73)                                               |                         | 11.4 (12)                                | 28.3 (85)                   |                      |             |
| No answer                                                              | 0.5 (1)                                                 |                         | 1.9 (2)                                  | 1.0 (3)                     |                      |             |
| Perceived severity: Evaluation of malnutrition                         | n=7                                                     |                         | n=374                                    | n=381                       | 0.172†               | 0.075       |
| Can state a reason                                                     | 71.4 (5)                                                |                         | 85.0 (318)                               | 84.8 (323)                  |                      |             |
| Do not know                                                            | 14.3 (1)                                                |                         | 11.2 (42)                                | 11.3 (43)                   |                      |             |
| No answer                                                              | 14.3 (1)                                                |                         | 3.7 (14)                                 | 3.9 (15)                    |                      |             |
| <i>Attitudes towards anemia and iron-rich foods</i>                    |                                                         |                         |                                          |                             |                      |             |
| Perceived susceptibility: Possibility of being anemic                  | n=131                                                   |                         | n=101                                    | n=232                       | <0.001               | 0.324       |
| Can state a reason                                                     | 34.4 (45)                                               |                         | 49.5 (50)                                | 40.9 (95)                   |                      |             |
| Do not know                                                            | 61.8 (81)                                               |                         | 32.7 (33)                                | 49.1 (114)                  |                      |             |
| No answer                                                              | 3.8 (5)                                                 |                         | 17.8 (18)                                | 9.9 (23)                    |                      |             |
| Perceived severity: Evaluation of anemia                               | n=1                                                     |                         | n=320                                    | n=321                       | 0.346†               | 0.096       |
| Can state a reason                                                     | 0.0 (0)                                                 |                         | 65.6 (210)                               | 65.4 (210)                  |                      |             |
| Do not know                                                            | 100.0 (1)                                               |                         | 25.0 (80)                                | 25.2 (81)                   |                      |             |
| No answer                                                              | 0.0 (0)                                                 |                         | 9.4 (30)                                 | 9.3 (30)                    |                      |             |
| Perceived benefits: Evaluation of preparation of iron-rich foods       | n=12                                                    |                         | n=314                                    | n=326                       | 0.875†               | 0.052       |
| Can state a reason                                                     | 50.0 (6)                                                |                         | 54.1 (170)                               | 54.0 (176)                  |                      |             |
| Do not know                                                            | 50.0 (6)                                                |                         | 40.8 (128)                               | 41.1 (134)                  |                      |             |
| No answer                                                              | 0.0 (0)                                                 |                         | 5.1 (16)                                 | 4.9 (16)                    |                      |             |
| Perceived barriers: Difficulty of preparing iron-rich foods            | n=62                                                    | n=130                   | n=39                                     | n=231                       | <0.001†              | 0.303       |
| Can state a reason                                                     | 29.0 (18)                                               | 45.4 (59)               | 87.2 (34)                                | 48.1 (111)                  |                      |             |
| Do not know                                                            | 45.2 (28)                                               | 46.2 (60)               | 12.8 (5)                                 | 40.3 (93)                   |                      |             |
| No answer                                                              | 25.8 (16)                                               | 8.5 (11)                | 0.0 (0)                                  | 11.7 (27)                   |                      |             |
| Self-confidence: Confidence in preparing iron-rich foods               | n=73                                                    | n=64                    | n=80                                     | n=217                       | <0.001               | 0.331       |
| Can state a reason                                                     | 31.5 (23)                                               | 15.6 (10)               | 62.5 (50)                                | 38.2 (83)                   |                      |             |
| Do not know                                                            | 42.5 (31)                                               | 68.8 (44)               | 36.3 (29)                                | 47.9 (104)                  |                      |             |
| No answer                                                              | 26.0 (19)                                               | 15.6 (10)               | 1.3 (1)                                  | 13.8 (30)                   |                      |             |
| <i>Attitudes towards vitamin A deficiency and vitamin A-rich foods</i> |                                                         |                         |                                          |                             |                      |             |
| Perceived susceptibility: Possibility of being vitamin A deficient     | n=123                                                   |                         | n=76                                     | n=199                       | <0.001†              | 0.408       |
| Can state a reason                                                     | 29.3 (36)                                               |                         | 68.4 (52)                                | 44.2 (88)                   |                      |             |
| Do not know                                                            | 68.3 (84)                                               |                         | 26.3 (20)                                | 52.3 (104)                  |                      |             |
| No answer                                                              | 2.4 (3)                                                 |                         | 5.3 (4)                                  | 3.5 (7)                     |                      |             |
| Perceived severity: Evaluation of vitamin A deficiency                 | n=4                                                     |                         | n=300                                    | n=304                       | 1.000†               | 0.031       |
| Can state a reason                                                     | 75.0 (3)                                                |                         | 66.3 (199)                               | 66.4 (202)                  |                      |             |
| Do not know                                                            | 25.0 (1)                                                |                         | 28.0 (84)                                | 28.0 (85)                   |                      |             |
| No answer                                                              | 0.0 (0)                                                 |                         | 5.7 (17)                                 | 5.6 (17)                    |                      |             |

|                                                                       |              |               |               |               |                  |              |
|-----------------------------------------------------------------------|--------------|---------------|---------------|---------------|------------------|--------------|
| Perceived benefits: Evaluation of preparation of vitamin A-rich foods | <i>n</i> =7  |               | <i>n</i> =307 | <i>n</i> =314 | 0.349†           | 0.072        |
| Can state a reason                                                    | 57.1 (4)     |               | 64.8 (199)    | 64.6 (203)    |                  |              |
| Do not know                                                           | 28.6 (2)     |               | 30.9 (95)     | 30.9 (97)     |                  |              |
| No answer                                                             | 14.3 (1)     |               | 4.2 (13)      | 4.5 (14)      |                  |              |
| Perceived barriers: Difficulty of preparing vitamin A-rich foods      | <i>n</i> =74 | <i>n</i> =112 | <i>n</i> =32  | <i>n</i> =218 | <b>0.004†</b>    | <b>0.190</b> |
| Can state a reason                                                    | 55.4 (41)    | 41.1 (46)     | 75.0 (24)     | 50.9 (111)    |                  |              |
| Do not know                                                           | 31.1 (23)    | 50.0 (56)     | 21.9 (7)      | 39.4 (86)     |                  |              |
| No answer                                                             | 13.5 (10)    | 8.9 (10)      | 3.1 (1)       | 9.6 (21)      |                  |              |
| Self-confidence: Confidence in preparing vitamin A-rich foods         | <i>n</i> =74 | <i>n</i> =63  | <i>n</i> =80  | <i>n</i> =217 | <b>&lt;0.001</b> | <b>0.327</b> |
| Can state a reason                                                    | 21.6 (16)    | 19.0 (12)     | 60.0 (48)     | 35.0 (76)     |                  |              |
| Do not know                                                           | 56.8 (42)    | 73.0 (46)     | 38.8 (31)     | 54.8 (119)    |                  |              |
| No answer                                                             | 21.6 (16)    | 7.9 (5)       | 1.3 (1)       | 10.1 (22)     |                  |              |

<sup>a</sup> Categorical variables are expressed as % (n).

<sup>b</sup> Lack of corresponding sum of frequencies with total sample size is due to missing data; total frequencies per variable are given.

<sup>c</sup> Significantly different at p-value <0.05 (in bold); P-value was derived using chi-square analysis for categorical variables.

† Fisher's exact test.

**Table S7:** Nutrition-related attitudes and associated reasons of lactating mothers

| <b>Variables <sup>a</sup></b>                                           | <b>Total <sup>b</sup><br/>N=444</b> |
|-------------------------------------------------------------------------|-------------------------------------|
| <i>Attitudes towards malnutrition</i>                                   |                                     |
| Perceived susceptibility: Possibility of being malnourished             | <i>n</i> =424                       |
| Possible                                                                | 24.8 (105)                          |
| Not possible                                                            | 46.9 (199)                          |
| Do not know                                                             | 26.4 (112)                          |
| No answer                                                               | 1.9 (8)                             |
| Reasons for malnutrition being possible <sup>c</sup>                    | <i>n</i> =105                       |
| Poor eating behavior (incl lack of food, lack of means, difficult life) | 18.1 (19)                           |
| If poor eating behavior (incl lack of means)                            | 53.3 (56)                           |
| Disease / bad for health / bad                                          | 4.8 (5)                             |
| If intestinal worms / no deworming                                      | 3.8 (4)                             |
| Exists, can happen to everyone                                          | 2.9 (3)                             |
| Being ill                                                               | 1.9 (2)                             |
| If ill                                                                  | 2.9 (3)                             |
| If pregnant while having small baby                                     | 1.0 (1)                             |
| World changes                                                           | 1.0 (1)                             |
| But I don't like (do not want/like)                                     | 1.0 (1)                             |
| Do not know                                                             | 11.4 (12)                           |
| No answer                                                               | 1.9 (2)                             |
| Reasons for malnutrition not being possible <sup>c</sup>                | <i>n</i> =195                       |
| Good eating behavior (incl financial means)                             | 31.3 (61)                           |
| If good eating behavior (incl financial means)                          | 1.5 (3)                             |
| Shameful (disease)                                                      | 8.7 (17)                            |
| Disease / bad for health / bad                                          | 8.7 (17)                            |
| Do not want / like                                                      | 4.6 (9)                             |
| Being adult                                                             | 3.1 (6)                             |
| Being healthy, no predisposition (incl knowledge)                       | 1.0 (2)                             |
| Not existent in the family                                              | 1.0 (2)                             |
| Prevention, coping practices                                            | 1.0 (2)                             |
| Cultivation                                                             | 1.0 (2)                             |
| Consulting medical staff                                                | 0.5 (1)                             |
| God                                                                     | 0.5 (1)                             |
| Do not know                                                             | 37.4 (73)                           |
| No answer                                                               | 0.5 (1)                             |
| Perceived severity: Evaluation of malnutrition                          | <i>n</i> =441                       |
| Problem                                                                 | 85.5 (377)                          |
| No problem                                                              | 2.5 (11)                            |
| Do not know                                                             | 11.6 (51)                           |
| No answer                                                               | 0.5 (2)                             |

|                                                           |               |
|-----------------------------------------------------------|---------------|
| Reasons for malnutrition being a problem <sup>c</sup>     | <i>n</i> =374 |
| Death / Disease leading to death                          | 25.7 (96)     |
| Disease (severe, dangerous)                               | 25.7 (96)     |
| Shameful (disease)                                        | 15.8 (59)     |
| Change/destruction of body/skin(/hair)                    | 9.4 (35)      |
| Bad / bad for health                                      | 4.8 (18)      |
| Weakness                                                  | 2.4 (9)       |
| Lack in the body / of food / of nutrient                  | 2.4 (9)       |
| Unwanted                                                  | 1.1 (4)       |
| Disease of the poor                                       | 1.1 (4)       |
| Impaired (child) growth                                   | 0.8 (3)       |
| Hardly heals                                              | 0.5 (2)       |
| Bad for life                                              | 0.5 (2)       |
| Lack of means                                             | 0.5 (2)       |
| Disease of ignorants                                      | 0.3 (1)       |
| Intestinal worms                                          | 0.3 (1)       |
| Emotional imbalance                                       | 0.3 (1)       |
| Great problem                                             | 0.3 (1)       |
| Do not know                                               | 11.2 (42)     |
| No answer                                                 | 3.7 (14)      |
| Reasons for malnutrition not being a problem <sup>c</sup> | <i>n</i> =7   |
| Disease                                                   | 42.9 (3)      |
| Unwanted                                                  | 14.3 (1)      |
| Existence of nutritional center                           | 14.3 (1)      |
| Do not know                                               | 14.3 (1)      |
| No answer                                                 | 14.3 (1)      |
| <hr/> <i>Attitudes towards anemia</i> <hr/>               |               |
| Perceived susceptibility: Possibility of being anemic     | <i>n</i> =420 |
| Possible                                                  | 24.3 (102)    |
| Not possible                                              | 32.1 (135)    |
| Do not know                                               | 41.7 (175)    |
| No answer                                                 | 1.9 (8)       |
| Reasons for anemia being possible <sup>c</sup>            | <i>n</i> =101 |
| Poor eating behavior (incl lack of means)                 | 3.0 (3)       |
| If poor eating behavior (incl lack of means)              | 22.8 (23)     |
| Being ill                                                 | 2.0 (2)       |
| If ill                                                    | 11.9 (12)     |
| Disease / bad for health / bad                            | 5.0 (5)       |
| If blood loss/abortion                                    | 2.0 (2)       |
| Exists, can happen to everyone                            | 2.0 (2)       |
| If neglecting                                             | 1.0 (1)       |
| Do not know                                               | 32.7 (33)     |
| No answer                                                 | 17.8 (18)     |
| Reasons for anemia not being possible <sup>c</sup>        | <i>n</i> =131 |
| Good eating behavior                                      | 18.3 (24)     |
| Disease / bad for health / bad                            | 5.3 (7)       |
| Do not want / like                                        | 4.6 (6)       |
| Knowledge                                                 | 1.5 (2)       |
| Not possible / not ill by anemia                          | 1.5 (2)       |
| Not existent in the family/community                      | 1.5 (2)       |
| Not being ill                                             | 0.8 (1)       |
| Do not know anemia                                        | 0.8 (1)       |
| God                                                       | 0.8 (1)       |
| Do not know                                               | 61.8 (81)     |
| No answer                                                 | 3.8 (5)       |
| Perceived severity: Evaluation of anemia                  | <i>n</i> =418 |
| Problem                                                   | 77.0 (322)    |
| No problem                                                | 1.0 (4)       |
| Do not know                                               | 21.3 (89)     |
| No answer                                                 | 0.7 (3)       |

|                                                                         |               |
|-------------------------------------------------------------------------|---------------|
| Reasons for anemia being a problem <sup>c</sup>                         | <i>n</i> =320 |
| Disease (bad)                                                           | 27.8 (89)     |
| Death, fatal disease, diseases are fatal                                | 25.3 (81)     |
| Bad, bad for health/body                                                | 7.2 (23)      |
| Weakness, fatigue, not able to work                                     | 2.8 (9)       |
| Vertigo                                                                 | 1.9 (6)       |
| Blood decrease                                                          | 1.3 (4)       |
| Malnutrition                                                            | 0.6 (2)       |
| Costly                                                                  | 0.3 (1)       |
| Growth retardation                                                      | 0.3 (1)       |
| Pallor                                                                  | 0.3 (1)       |
| Shameful                                                                | 0.3 (1)       |
| Weight loss                                                             | 0.3 (1)       |
| Disease that transforms the eyes                                        | 0.3 (1)       |
| Do not know                                                             | 25.0 (80)     |
| No answer                                                               | 9.4 (30)      |
| Reasons for anemia not being a problem <sup>c</sup>                     | <i>n</i> =1   |
| Do not know                                                             | 100.0 (1)     |
| <hr/> <i>Attitudes towards iron-rich foods</i> <hr/>                    |               |
| Perceived benefits: Evaluation of preparation of iron-rich foods        | <i>n</i> =443 |
| Good                                                                    | 71.6 (317)    |
| Bad                                                                     | 2.7 (12)      |
| Do not know                                                             | 24.6 (109)    |
| No answer                                                               | 1.1 (5)       |
| Reasons for good value of iron-rich foods <sup>c</sup>                  | <i>n</i> =314 |
| Good for health                                                         | 29.9 (94)     |
| Increasing blood                                                        | 8.0 (25)      |
| Increasing iron                                                         | 7.0 (22)      |
| Increasing strength/energy                                              | 1.9 (6)       |
| Construction, protection                                                | 1.9 (6)       |
| Preventing disease, death                                               | 1.6 (5)       |
| Rich in/increasing nutrients/vitamins                                   | 1.6 (5)       |
| Preventing anemia                                                       | 1.0 (3)       |
| Help, good life                                                         | 1.0 (3)       |
| Satisfying                                                              | 0.6 (2)       |
| Like                                                                    | 0.3 (1)       |
| For cooking                                                             | 0.3 (1)       |
| Good                                                                    | 0.3 (1)       |
| Preventing malnutrition                                                 | 0.3 (1)       |
| Available                                                               | 0.3 (1)       |
| Tasty                                                                   | 0.3 (1)       |
| Treat the problem                                                       | 0.3 (1)       |
| Other                                                                   | 0.3 (1)       |
| Do not know                                                             | 40.8 (128)    |
| No answer                                                               | 5.1 (16)      |
| Reasons for no/bad value of iron-rich foods <sup>c</sup>                | <i>n</i> =12  |
| Excess is not beneficial neither                                        | 50.0 (6)      |
| Do not know                                                             | 50.0 (6)      |
| Perceived barriers: Difficulty of preparing iron-rich foods             | <i>n</i> =425 |
| Difficult                                                               | 14.6 (62)     |
| Neither difficult nor easy                                              | 31.1 (132)    |
| Easy                                                                    | 9.2 (39)      |
| Do not know                                                             | 42.1 (179)    |
| No answer                                                               | 3.1 (13)      |
| Reasons for preparation of iron-rich foods being difficult <sup>c</sup> | <i>n</i> =62  |
| Lack of financial means                                                 | 14.5 (9)      |
| Lack of knowledge (about iron-rich foods)                               | 11.3 (7)      |
| Time-consuming                                                          | 1.6 (1)       |
| Gives strength                                                          | 1.6 (1)       |
| Do not know                                                             | 45.2 (28)     |
| No answer                                                               | 25.8 (16)     |

|                                                                                          |               |
|------------------------------------------------------------------------------------------|---------------|
| Reasons for preparation of iron-rich foods being neither difficult nor easy <sup>c</sup> | <i>n</i> =130 |
| According to financial means / if means                                                  | 25.4 (33)     |
| According to availability / if available                                                 | 6.2 (8)       |
| Depending on knowledge / if knowledge (about iron-rich foods)                            | 4.6 (6)       |
| Lack of knowledge (about iron-rich foods)                                                | 3.8 (5)       |
| Availability of iron-rich foods                                                          | 3.1 (4)       |
| Considering it + coping to have them                                                     | 1.5 (2)       |
| Bad life                                                                                 | 0.8 (1)       |
| Preparing everything                                                                     | 0.8 (1)       |
| Standard meal                                                                            | 0.8 (1)       |
| Good for health                                                                          | 0.8 (1)       |
| Do not know                                                                              | 46.2 (60)     |
| No answer                                                                                | 8.5 (11)      |
| Reasons for preparation of iron-rich foods being easy <sup>c</sup>                       | <i>n</i> =39  |
| Availability of iron-rich foods                                                          | 46.2 (18)     |
| Knows/used to preparing, easy to prepare                                                 | 12.8 (5)      |
| Availability of ember/coal                                                               | 7.7 (3)       |
| Depending on availability of necessary / if necessary available                          | 7.7 (3)       |
| Affordability of iron-rich foods                                                         | 5.1 (2)       |
| According to financial means / if means                                                  | 5.1 (2)       |
| Not demanding                                                                            | 2.6 (1)       |
| Does not have defense                                                                    | 2.6 (1)       |
| Good for health                                                                          | 2.6 (1)       |
| Do not know                                                                              | 12.8 (5)      |
| Self-confidence: Confidence in preparing iron-rich foods                                 | <i>n</i> =439 |
| Not confident                                                                            | 16.9 (74)     |
| Ok / so-so                                                                               | 15.5 (68)     |
| Confident                                                                                | 19.4 (85)     |
| Do not know                                                                              | 40.5 (178)    |
| No answer                                                                                | 7.7 (34)      |
| Reasons for being not confident in preparation of iron-rich foods <sup>c</sup>           | <i>n</i> =73  |
| Lack of financial means                                                                  | 15.1 (11)     |
| Lack of knowledge (about iron-rich foods)                                                | 13.7 (10)     |
| Not being a professional                                                                 | 1.4 (1)       |
| No dietary diversity                                                                     | 1.4 (1)       |
| Do not know                                                                              | 42.5 (31)     |
| No answer                                                                                | 26.0 (19)     |
| Reasons for being ok with preparation of iron-rich foods <sup>c</sup>                    | <i>n</i> =64  |
| Good for health                                                                          | 4.7 (3)       |
| Availability of iron-rich foods                                                          | 3.1 (2)       |
| According to/depending on financial means / if means                                     | 3.1 (2)       |
| Lack of knowledge (about iron-rich foods)                                                | 1.6 (1)       |
| Good eating behavior (well, iron-rich foods)                                             | 1.6 (1)       |
| Like                                                                                     | 1.6 (1)       |
| Do not know                                                                              | 68.8 (44)     |
| No answer                                                                                | 15.6 (10)     |
| Reasons for being confident in preparation of iron-rich foods <sup>c</sup>               | <i>n</i> =80  |
| Good for health                                                                          | 28.7 (23)     |
| Preparing well / iron-rich foods                                                         | 10.0 (8)      |
| Food / good food / good                                                                  | 8.8 (7)       |
| Good eating behavior (well, iron-rich foods)                                             | 5.0 (4)       |
| Like                                                                                     | 5.0 (4)       |
| Normal, as a woman                                                                       | 3.8 (3)       |
| Availability of iron-rich foods                                                          | 2.5 (2)       |
| Working well                                                                             | 1.3 (1)       |
| Do not know                                                                              | 36.6 (29)     |
| No answer                                                                                | 1.3 (1)       |

|                                                                    |               |
|--------------------------------------------------------------------|---------------|
| <i>Attitudes towards vitamin A deficiency</i>                      |               |
| Perceived susceptibility: Possibility of being vitamin A deficient | <i>n</i> =435 |
| Possible                                                           | 17.9 (78)     |
| Not possible                                                       | 29.4 (128)    |
| Do not know                                                        | 50.6 (220)    |
| No answer                                                          | 2.1 (9)       |
| Reasons for vitamin A deficiency being possible <sup>c</sup>       | <i>n</i> =76  |
| Poor eating behavior (incl lack of means)                          | 18.4 (14)     |
| If poor eating behavior (incl lack of means)                       | 35.5 (27)     |
| Being ill                                                          | 2.6 (2)       |
| If ill                                                             | 3.9 (3)       |
| No knowledge about vitamin A-rich foods                            | 2.6 (2)       |
| If no knowledge about vitamin A-rich foods                         | 3.9 (3)       |
| If blood decrease                                                  | 1.3 (1)       |
| Can happen                                                         | 1.3 (1)       |
| Vertigo                                                            | 1.3 (1)       |
| Do not know                                                        | 26.3 (20)     |
| No answer                                                          | 5.3 (4)       |
| Reasons for vitamin A deficiency not being possible <sup>c</sup>   | <i>n</i> =123 |
| Good eating behavior                                               | 18.7 (23)     |
| Disease / bad for health / bad                                     | 3.3 (4)       |
| Being healthy / not ill                                            | 2.4 (3)       |
| If financial means                                                 | 1.6 (2)       |
| Knowledge about vitamin A-rich foods                               | 1.6 (2)       |
| If knowledge about vitamin A-rich foods                            | 0.8 (1)       |
| Do not want                                                        | 0.8 (1)       |
| Do not know vitamin A                                              | 0.8 (1)       |
| Avoid bad situation                                                | 0.8 (1)       |
| Do not know                                                        | 68.3 (84)     |
| No answer                                                          | 2.4 (3)       |
| Perceived severity: Evaluation of vitamin A deficiency             | <i>n</i> =438 |
| Problem                                                            | 69.4 (304)    |
| No problem                                                         | 2.5 (11)      |
| Do not know                                                        | 26.9 (118)    |
| No answer                                                          | 1.1 (5)       |
| Reasons for vitamin A deficiency being a problem <sup>c</sup>      | <i>n</i> =300 |
| Disease                                                            | 27.7 (83)     |
| Death, fatal disease, diseases are fatal                           | 11.0 (33)     |
| Weakness, fatigue                                                  | 9.7 (29)      |
| Vision loss, eye problems, blindness                               | 5.7 (17)      |
| Bad, bad for health/body                                           | 5.0 (15)      |
| Causes disease, susceptible for disease, impaired immune system    | 5.0 (15)      |
| Malnutrition, kwashiorkor, deficiency, eating poorly               | 2.0 (6)       |
| Weight loss, no weight gain                                        | 1.0 (3)       |
| Importance of vitamin A                                            | 0.7 (2)       |
| Already affected                                                   | 0.3 (1)       |
| Expensive care                                                     | 0.3 (1)       |
| Lack of care                                                       | 0.3 (1)       |
| Vaccination only for dangerous diseases                            | 0.3 (1)       |
| Blood decrease                                                     | 0.3 (1)       |
| Do not know                                                        | 28.0 (84)     |
| No answer                                                          | 5.7 (17)      |
| Reasons for vitamin A deficiency not being a problem <sup>c</sup>  | <i>n</i> =4   |
| Vitamin A in spring water                                          | 25.0 (1)      |
| Vitamin A in meals                                                 | 25.0 (1)      |
| Preparation possible if knowledge                                  | 25.0 (1)      |
| Do not know                                                        | 25.0 (1)      |



|                                                                                               |               |
|-----------------------------------------------------------------------------------------------|---------------|
| <i>Attitudes towards vitamin A-rich foods</i>                                                 |               |
| Perceived benefits: Evaluation of preparation of vitamin A-rich foods                         | <i>n</i> =442 |
| Good                                                                                          | 71.9 (318)    |
| Bad                                                                                           | 1.8 (8)       |
| Do not know                                                                                   | 24.9 (110)    |
| No answer                                                                                     | 1.4 (6)       |
| Reasons for good value of vitamin A-rich foods <sup>c</sup>                                   | <i>n</i> =307 |
| Good, good for health/body                                                                    | 33.6 (103)    |
| Providing/increasing vitamin A                                                                | 12.7 (39)     |
| Increase of energy/strength                                                                   | 5.5 (17)      |
| Providing/increasing nutrients/vitamins                                                       | 5.5 (17)      |
| Protection (against diseases), improving immune system                                        | 3.9 (12)      |
| Good for vision, protection of eyes, avoiding vision loss                                     | 1.6 (5)       |
| Good for growth                                                                               | 1.3 (4)       |
| Construction                                                                                  | 1.0 (3)       |
| Increase of blood                                                                             | 0.7 (2)       |
| Brings breast milk                                                                            | 0.3 (1)       |
| Easy                                                                                          | 0.3 (1)       |
| Do not know                                                                                   | 30.9 (95)     |
| No answer                                                                                     | 4.2 (13)      |
| Reasons for no/bad value of vitamin A-rich foods <sup>c</sup>                                 | <i>n</i> =7   |
| Excess is not beneficial neither                                                              | 57.1 (4)      |
| Do not know                                                                                   | 28.6 (2)      |
| No answer                                                                                     | 14.3 (1)      |
| Perceived barriers: Difficulty of preparing vitamin A-rich foods                              | <i>n</i> =441 |
| Difficult                                                                                     | 17.0 (75)     |
| Neither difficult nor easy                                                                    | 26.3 (116)    |
| Easy                                                                                          | 7.9 (35)      |
| Do not know                                                                                   | 44.0 (194)    |
| No answer                                                                                     | 4.8 (21)      |
| Reasons for preparation of vitamin A-rich foods being difficult <sup>c</sup>                  | <i>n</i> =74  |
| Lack of financial means                                                                       | 31.1 (23)     |
| Lack of knowledge (about vitamin A/vitamin A-rich foods)                                      | 23.0 (17)     |
| Not available                                                                                 | 1.4 (1)       |
| According to/depending on/if financial means                                                  | 1.4 (1)       |
| Do not know                                                                                   | 31.1 (23)     |
| No answer                                                                                     | 13.5 (10)     |
| Reasons for preparation of vitamin A-rich foods being neither difficult nor easy <sup>c</sup> | <i>n</i> =112 |
| According to/depending on/if financial means                                                  | 24.1 (27)     |
| According to/depending on/if availability                                                     | 6.9 (7)       |
| Lack of financial means                                                                       | 2.7 (3)       |
| Lack of knowledge (about vitamin A/vitamin A-rich foods)                                      | 2.7 (3)       |
| Depending on if knowledge (about vitamin A-rich foods)                                        | 1.8 (2)       |
| Contained in usual food                                                                       | 1.8 (2)       |
| Available                                                                                     | 0.9 (1)       |
| Knows/used to preparing, easy to prepare                                                      | 0.9 (1)       |
| Financial means                                                                               | 0.9 (1)       |
| Coping for good diet                                                                          | 0.9 (1)       |
| Do not know                                                                                   | 50.0 (56)     |
| No answer                                                                                     | 8.9 (10)      |

|                                                                                          |               |
|------------------------------------------------------------------------------------------|---------------|
| Reasons for preparation of vitamin A-rich foods being easy <sup>c</sup>                  | <i>n</i> =32  |
| Available                                                                                | 28.1 (9)      |
| Affordable                                                                               | 15.6 (5)      |
| Knows/used to preparing, easy to prepare                                                 | 15.6 (5)      |
| According to/depending on/if availability                                                | 9.4 (3)       |
| According to/depending on/if financial means                                             | 3.1 (1)       |
| Depending on/if knowledge (about vitamin A-rich foods)                                   | 3.1 (1)       |
| Good meal                                                                                | 3.1 (1)       |
| Do not know                                                                              | 21.9 (7)      |
| No answer                                                                                | 3.1 (0)       |
| Self-confidence: Confidence in preparing vitamin A-rich foods                            | <i>n</i> =442 |
| Not confident                                                                            | 16.7 (74)     |
| Ok / so-so                                                                               | 15.4 (68)     |
| Confident                                                                                | 19.7 (87)     |
| Do not know                                                                              | 42.3 (187)    |
| No answer                                                                                | 5.9 (26)      |
| Reasons for being not confident in preparation of vitamin A-rich foods <sup>c</sup>      | <i>n</i> =74  |
| Lack of financial means                                                                  | 12.2 (9)      |
| Lack of knowledge (about VA-rich foods)                                                  | 9.5 (7)       |
| Not available/no means                                                                   | 1.4 (1)       |
| Do not know                                                                              | 56.8 (42)     |
| No answer                                                                                | 21.6 (16)     |
| Reasons for being ok with preparation of vitamin A-rich foods <sup>c</sup>               | <i>n</i> =63  |
| According to/depending on/if financial means                                             | 4.8 (3)       |
| Good, good for health                                                                    | 3.2 (2)       |
| Good meal, increasing nutrients/vitamins/vitamin A/<br>energy/strength/blood, satisfying | 1.6 (1)       |
| Financial means                                                                          | 1.6 (1)       |
| Like                                                                                     | 1.6 (1)       |
| Knowledge (about vitamin A-rich/important foods)                                         | 1.6 (1)       |
| Lack of knowledge (about vitamin A-rich foods)                                           | 1.6 (1)       |
| Depending on knowledge                                                                   | 1.6 (1)       |
| Lack of financial means                                                                  | 1.6 (1)       |
| Seems to increase weight                                                                 | 1.6 (1)       |
| Do not know                                                                              | 73.0 (46)     |
| No answer                                                                                | 7.9 (5)       |
| Reasons for being confident in preparation of vitamin A-rich foods <sup>c</sup>          | <i>n</i> =80  |
| Good, good for health                                                                    | 20.0 (16)     |
| Good meal, increasing nutrients/vitamins/vitamin A/<br>energy/strength/blood, satisfying | 17.5 (14)     |
| Preparing well, used of preparing                                                        | 8.8 (7)       |
| Like                                                                                     | 5.0 (4)       |
| Available                                                                                | 3.8 (3)       |
| According to/depending on/if financial means                                             | 2.5 (2)       |
| Good eating behavior (well)                                                              | 1.3 (1)       |
| If available                                                                             | 1.3 (1)       |
| Increasing                                                                               | 1.3 (1)       |
| Knowledge (about vitamin A-rich/important foods)                                         | 1.3 (1)       |
| Do not know                                                                              | 38.8 (31)     |
| No answer                                                                                | 1.3 (1)       |

<sup>a</sup> Categorical variables are expressed as % (n).

<sup>b</sup> Lack of corresponding sum of frequencies with total sample size is due to missing data; total frequencies per variable are given.

<sup>c</sup> Multiple response question.

**Table S8:** Food group consumption of lactating mothers

| <b>Variables <sup>a</sup></b>              | <b>Total <sup>b</sup><br/>N=411</b> |
|--------------------------------------------|-------------------------------------|
| Starchy staples                            | 99.8 (410)                          |
| Grains                                     | 71.8 (295)                          |
| White roots and tubers, plantains          | 85.2 (350)                          |
| Pulses                                     | 29.7 (122)                          |
| Soy                                        | 10.7 (44)                           |
| Beans, lentils                             | 20.7 (85)                           |
| Nuts and seeds                             | 14.4 (59)                           |
| Milk and milk products                     | 6.3 (26)                            |
| Fresh milk                                 | 0.2 (1)                             |
| Powdered milk                              | 5.4 (22)                            |
| Cheese, yogurt, dairy products             | 0.7 (3)                             |
| Meat, poultry, fish                        | 47.4 (195)                          |
| Meat                                       | 8.0 (33)                            |
| Poultry                                    | 0.5 (2)                             |
| Organs                                     | 0.2 (1)                             |
| Fish and seafood                           | 41.4 (170)                          |
| Eggs                                       | 0.2 (1)                             |
| Dark green leafy vegetables                | 64.5 (265)                          |
| Other vitamin A-rich fruits and vegetables | 1.0 (4)                             |
| Other vitamin A-rich fruits                | 1.0 (4)                             |
| Other vitamin A-rich vegetables            | 0.0 (0)                             |
| Other vegetables                           | 60.8 (250)                          |
| Other fruits                               | 11.7 (48)                           |
| Oils and fats                              | 77.9 (320)                          |
| Vegetable oil, other fats                  | 29.4 (121)                          |
| Palm oil                                   | 57.7 (237)                          |
| Unhealthy foods                            | 26.0 (107)                          |
| Fried and salty foods                      | 2.4 (10)                            |
| Sweet foods                                | 10.2 (42)                           |
| Sweet beverages                            | 16.3 (67)                           |
| Alcoholic beverages                        | 0.7 (3)                             |
| Condiments and seasonings                  | 90.0 (370)                          |
| Other beverages and foods                  | 0.5 (2)                             |

<sup>a</sup>Categorical variables are expressed as % (n).

<sup>b</sup>Lack of corresponding sum of frequencies with total sample size is due to missing data and mothers not eating at the reported day.

**Table S9:** K-, P-Scores, DDS, and Hb concentration of lactating mothers and infants by maternal educational level

| Variables <sup>a</sup>     | Low educational level | Elementary educational level | Secondary educational level | Total <sup>b</sup> | P-value <sup>c</sup> |
|----------------------------|-----------------------|------------------------------|-----------------------------|--------------------|----------------------|
|                            | n=71                  | n=140                        | n=230                       | n=441              |                      |
| K-Score 3 food group model | n=69                  | n=137                        | n=229                       | n=435              | 0.146                |
|                            | 0.42 ± 0.34           | 0.33 ± 0.35                  | 0.36 ± 0.34                 | 0.36 ± 0.35        |                      |
|                            | 0.25                  | 0.25                         | 0.25                        | 0.25               |                      |
|                            | (0.25, 0.75)          | (0.00, 0.50)                 | (0.00, 0.75)                | (0.00, 0.75)       |                      |
| K-Score malnutrition       | n=70                  | n=138                        | n=230                       | n=438              | 0.318                |
|                            | 0.79 ± 0.32           | 0.74 ± 0.34                  | 0.77 ± 0.33                 | 0.76 ± 0.33        |                      |
|                            | 1.00                  | 1.00                         | 1.00                        | 1.00               |                      |
|                            | (0.75, 1.00)          | (0.50, 1.00)                 | (0.50, 0.75)                | (0.50, 1.00)       |                      |
| K-Score iron + anemia      | n=69                  | n=134                        | n=222                       | n=425              | 0.467                |
|                            | 0.27 ± 0.32           | 0.24 ± 0.30                  | 0.23 ± 0.31                 | 0.24 ± 0.31        |                      |
|                            | 0.14                  | 0.00                         | 0.00                        | 0.00               |                      |
|                            | (0.00, 0.57)          | (0.00, 0.45)                 | (0.00, 0.50)                | (0.00, 0.50)       |                      |
| K-Score vitamin A + VAD    | n=69                  | n=138                        | n=225                       | n=432              | <b>&lt;0.001</b>     |
|                            | 0.39 ± 0.40           | 0.41 ± 0.41                  | 0.25 ± 0.38                 | 0.33 ± 0.40        |                      |
|                            | 0.33 <sup>i</sup>     | 0.33 <sup>i</sup>            | 0.00 <sup>ii</sup>          | 0.00               |                      |
|                            | (0.00, 0.75)          | (0.00, 0.75)                 | (0.00, 0.75)                | (0.00, 0.75)       |                      |
| K-Score total              | n=70                  | n=136                        | n=230                       | n=436              | 0.139                |
|                            | 0.45 ± 0.25           | 0.42 ± 0.23                  | 0.39 ± 0.23                 | 0.41 ± 0.24        |                      |
|                            | 0.44                  | 0.39                         | 0.35                        | 0.39               |                      |
|                            | (0.24, 0.64)          | (0.24, 0.56)                 | (0.24, 0.56)                | (0.24, 0.56)       |                      |
| P-Score iron               | n=70                  | n=135                        | n=218                       | n=423              | <b>0.009</b>         |
|                            | 0.43 ± 0.15           | 0.40 ± 0.15                  | 0.45 ± 0.13                 | 0.43 ± 0.14        |                      |
|                            | 0.50 <sup>i, ii</sup> | 0.33 <sup>i</sup>            | 0.50 <sup>ii</sup>          | 0.50               |                      |
|                            | (0.33, 0.50)          | (0.33, 0.50)                 | (0.33, 0.50)                | (0.33, 0.50)       |                      |
| Dietary Diversity Score    | n=64                  | n=134                        | n=211                       | n=409              | 0.201                |
|                            | 3.2 ± 1.1             | 3.3 ± 1.0                    | 3.5 ± 1.2                   | 3.4 ± 1.1          |                      |
|                            | 3.0                   | 3.0                          | 3.0                         | 3.0                |                      |
|                            | (2.0, 4.0)            | (3.0, 4.0)                   | (3.0, 4.0)                  | (3.0, 4.0)         |                      |
| Maternal Hb                | n=69                  | n=139                        | n=225                       | n=433              | 0.883                |
|                            | 12.4 ± 1.8            | 12.5 ± 1.6                   | 12.5 ± 1.4                  | 12.5 ± 1.5         |                      |
|                            | 12.7                  | 12.8                         | 12.7                        | 12.7               |                      |
|                            | (11.3, 13.7)          | (12.0, 13.6)                 | (11.7, 13.5)                | (11.7, 13.5)       |                      |
| Infantile Hb               | n=70                  | n=140                        | n=226                       | n=436              | 0.136                |
|                            | 10.2 ± 1.5            | 10.3 ± 1.6                   | 10.1 ± 1.4                  | 10.2 ± 1.5         |                      |
|                            | 10.2                  | 10.3                         | 9.9                         | 10.1               |                      |
|                            | (9.3, 11.1)           | (9.6, 11.1)                  | (9.2, 10.9)                 | (9.3, 11.0)        |                      |

<sup>a</sup>Metric variables are expressed as mean ± SD and median (IQR).

<sup>b</sup>Lack of corresponding sum of frequencies with total sample size is due to missing data; total frequencies per variable are given.

<sup>c</sup>Significantly different at P-value <0.05 (in bold); P-value was derived using Kruskal-Wallis test for metric variables.

<sup>i, ii</sup> Groups with differing characters differ significantly.

VAD: vitamin A deficiency.
